# Supplementary material for: A Pilot Study of miRNA Expression Profile as a Liquid Biopsy for Full-Marathon Participants
Source: MDPI journal article supplement (doi:10.3390/sports9100134), 2021-09-24
Supplement: s1 [file s1]

**Table S1.** Quality summary of sequence read data.

| Sample | Reads      | Bases   | Error Rate | Q20    | Q30    | GC content |
|--------|------------|---------|------------|--------|--------|------------|
| P-pre  | 26,700,063 | 1.335 G | 0.01%      | 95.95% | 92.75% | 52.87%     |
| P-post | 30,186,552 | 1.509 G | 0.01%      | 96.20% | 93.40% | 52.33%     |
| P-2h   | 27,394,864 | 1.370 G | 0.02%      | 93.39% | 89.92% | 50.52%     |
| P-1d   | 28,410,157 | 1.421 G | 0.02%      | 94.30% | 91.01% | 50.19%     |
| U-pre  | 19,103,375 | 0.955 G | 0.01%      | 97.08% | 94.41% | 54.20%     |
| U-post | 36,654,940 | 1.833 G | 0.01%      | 96.27% | 92.95% | 53.24%     |
| U-2h   | 33,698,200 | 1.685 G | 0.01%      | 96.07% | 92.84% | 54.23%     |
| U-1d   | 34,899,738 | 1.745 G | 0.01%      | 96.17% | 92.82% | 54.97%     |

Abbreviations: Sample means Sample id. Reads means statistics of the original sequence data. Bases means sequence number multiplied by the length of the sequence, expressed in giga base pairs (Gbp). Error rate means Sequencing error rate. Q20 means Phred values greater than 20 base percentage accounted for the overall base. Q30 means Phred values greater than 30 base percentage accounted for the overall base. GC content means The G base and C base accounted for the overall base.

**Table S2.** Data filtering summary.

| Sample | Total Reads             | N% > 10%        | Low Quality        | 5' Adapter contamination | 3' Adapter or Insert Missing | With Poly A/T/G/C / | Clean Reads            |
|--------|-------------------------|-----------------|--------------------|--------------------------|------------------------------|---------------------|------------------------|
| P-pre  | 26,700,063<br>(100.00%) | 14<br>(0.00%)   | 329,307<br>(1.23%) | 6,295,834<br>(23.58%)    | 4,183,299<br>(15.67%)        | 10,874<br>(0.04%)   | 15,880,735<br>(59.48%) |
| P-post | 30,186,552<br>(100.00%) | 147<br>(0.00%)  | 433,909<br>(1.44%) | 23,358,870<br>(7.74%)    | 2,756,135<br>(9.13%)         | 33,307<br>(0.11%)   | 24,627,184<br>(81.58%) |
| P-2h   | 27,394,864<br>(100.00%) | 104<br>(0.00 %) | 959,160<br>(3.50%) | 4,338,166<br>(15.84%)    | 13,042,915<br>(47.61%)       | 8006<br>(0.03%)     | 9,046,513<br>(33.02%)  |
| P-1d   | 28,410,157<br>(100.00%) | 103<br>(0.00%)  | 775,318<br>(2.73%) | 4,855,849<br>(17.09%)    | 15,099,673<br>(53.15%)       | 10,184<br>(0.04%)   | 7,669,030<br>(26.99%)  |
| U-pre  | 19,103,375<br>(100.00%) | 88<br>(0.00%)   | 142,368<br>(0.75%) | 198,891<br>(1.04%)       | 2,183,578<br>(11.43 %)       | 38,126<br>(0.20%)   | 16,540,324<br>(86.58%) |
| U-post | 36,654,940<br>(100.00%) | 9<br>(0.00%)    | 296,482<br>(0.81%) | 431,934<br>(1.18%)       | 4,829,196<br>(13.17%)        | 92,331<br>(0.25%)   | 31,004,988<br>(84.59%) |
| U-2h   | 33,698,200<br>(100.00%) | 15<br>(0.00%)   | 395,809<br>(1.17%) | 545,835<br>(1.59%)       | 5,212,985<br>(15.47%)        | 69,513<br>(0.21%)   | 27,484,043<br>(81.56%) |
| U-1d   | 34,899,738<br>(100.00%) | 15<br>(0.00%)   | 337,739<br>(0.97%) | 327,173<br>(0.94%)       | 4,513,274<br>(12.93%)        | 54,835<br>(0.16%)   | 29,666,702<br>(85.01%) |

Abbreviations: Sample means Sample ID. Total Reads mean total sequenced reads. N% > 10% means percentage of reads with N > 10%. Low Quality means percentage of low-quality reads. 5' Adapter Contamination means percentage of reads with 5' adapter contamination. 3' Adapter or Insert Missing means percentage of reads without 3' adapter or insert. With PloyA/T/G/C means percentage of reads with PloyA/T/G/C tails. Clean Reads means total clean reads followed by clean reads as a percentage of raw reads.

**Table S3.** Type, quantity of total RNA and percentage.

| Type      | P-pre     | P-pre (%) | P-post    | P-post (%) | P-2h      | P-2h (%) | P-1d    | P-1d (%) |
|-----------|-----------|-----------|-----------|------------|-----------|----------|---------|----------|
| Total RNA | 2,714,180 | 100.00%   | 7,378,428 | 100.00%    | 1,950,701 | 100.00%  | 956,359 | 100.00%  |
| Known RNA | 1,325,211 | 48.83%    | 679,705   | 9.21%      | 665,899   | 34.14%   | 439,583 | 45.96%   |
| Novel RNA | 457       | 0.02%     | 580       | 0.01%      | 257       | 0.01%    | 175     | 0.02%    |

| Type      | U-pre     | U-pre (%) | U-post    | U-post (%) | U-2h      | U-2h (%) | U-1d      | U-1d (%) |
|-----------|-----------|-----------|-----------|------------|-----------|----------|-----------|----------|
| Total RNA | 1,597,905 | 100.00%   | 4,717,808 | 100.00%    | 2,830,579 | 100.00%  | 2,148,286 | 100.00%  |
| Known RNA | 90,402    | 5.66%     | 70,931    | 1.50%      | 50,283    | 1.78%    | 88,936    | 4.14%    |
| Novel RNA | 976       | 0.06%     | 2740      | 0.06%      | 2982      | 0.11%    | 2047      | 0.10%    |

Abbreviations: Total RNA means the quantity of sRNA reads mapped to genome. Known miRNA means the number and percentage of sRNAs reads mapped to known miRNA. Novel miRNA means the number and percentage of sRNAs reads mapped to novel miRNA.

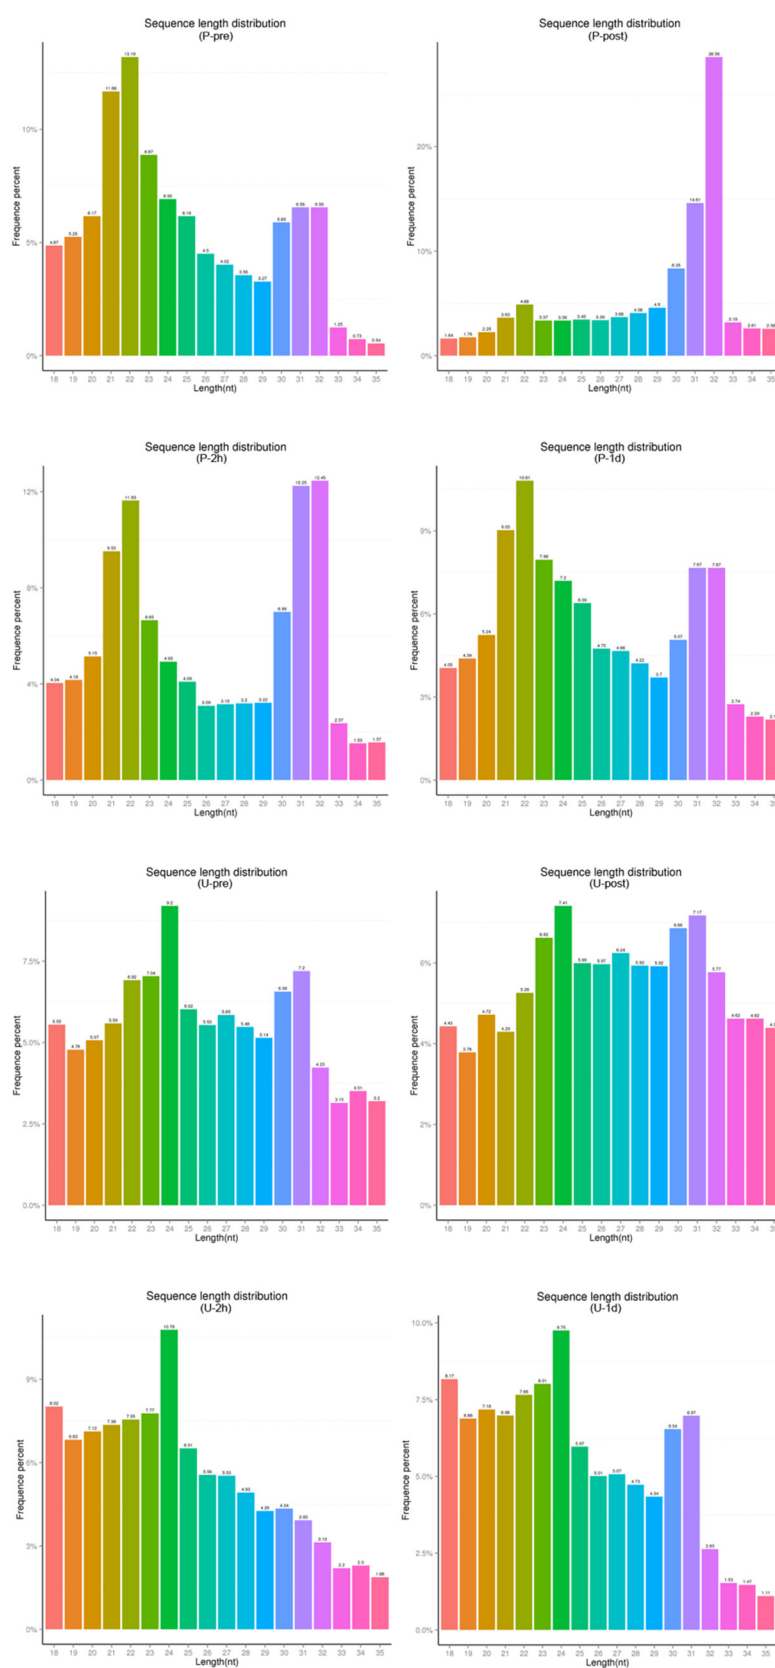

**Figure S1.** Sequencing distribution of total RNA.

Abbreviations: X-axis means sRNA length (nt). Y-axis means frequency percentage (%)
